# Supplementary material for: Incidence of Attention Deficit Hyperactivity Disorder (ADHD) Diagnoses in Navarre (Spain) from 2003 to 2019
Source: MDPI journal article supplement (doi:10.3390/ijerph18179208), 2021-08-31
Supplement: s1 [file s1]

**Table S1.** Attention deficit hyperactivity disorder (ADHD) diagnostic codes

| Classification system                                                              | ADHD diagnostic code                                                                    |
|------------------------------------------------------------------------------------|-----------------------------------------------------------------------------------------|
| International Classification of Primary Care (ICPC)                                | P81: Hyperactivity disorder <sup>a</sup>                                                |
|                                                                                    | P22: Behavioral signs/symptoms in children. Behavioral or conduct problems <sup>b</sup> |
|                                                                                    | P23: Behavioral signs/symptoms in adolescents <sup>b</sup>                              |
|                                                                                    | P24: Specific learning problems <sup>b</sup>                                            |
| 10 <sup>th</sup> Revision of the International Classification of Diseases (ICD-10) | F90.0: Attention deficit hyperactivity disorder, with predominance of inattentive type  |
|                                                                                    | F90.1: Attention deficit hyperactivity disorder, with predominance of hyperactive type  |
|                                                                                    | F90.8: Attention deficit hyperactivity disorder, other type                             |
|                                                                                    | F90.9: F90.8: Attention deficit hyperactivity disorder, type not specified              |

<sup>a</sup>Cases in which the literal text associated to the diagnostic code corresponded to ADHD diagnoses were only included.

<sup>b</sup>Cases in which the literal text associated to the diagnostic code included the following terms in Spanish were only considered: "TDA\*", "TDH\*", "HYPER\*", "ACTIV\*", "ATENC\*".

**Table S2.** Biennial Attention deficit hyperactivity disorder (ADHD)ases, person-years and incidence rate

| <b>Year</b>                               | <b>2003</b> | <b>2005</b> | <b>2007</b> | <b>2009</b> | <b>2011</b> | <b>2013</b> | <b>2015</b> | <b>2017</b> | <b>2019</b> |
|-------------------------------------------|-------------|-------------|-------------|-------------|-------------|-------------|-------------|-------------|-------------|
| <b>Cases</b>                              | 322         | 697         | 921         | 1096        | 1199        | 1191        | 1091        | 766         | 108         |
| <b>Person-<br/>years</b>                  | 77011.97    | 100671.98   | 124289.90   | 147585.92   | 163726.17   | 171483.69   | 174236.52   | 159496.10   | 48975.61    |
| <b>Incidence<br/>rate (per<br/>1,000)</b> | 4.18        | 6.92        | 7.41        | 7.43        | 7.32        | 6.95        | 6.26        | 4.80        | 2.21        |

**Table S3.** Goodness of fit of the age-period-cohort model<sup>a</sup>

|            | <b>Deviance</b> | <b>Residual df</b> | <b>p</b> | <b>LR vs APC</b> | <b>Df vs APC</b> | <b>p</b> | <b>AIC</b> |
|------------|-----------------|--------------------|----------|------------------|------------------|----------|------------|
| <b>APC</b> | 78,302          | 35                 | <0.001   | N/A              | N/A              | N/A      | 496.964    |
| <b>AP</b>  | 100,741         | 48                 | <0.001   | 22.439           | 13               | 0.049    | 493.402    |
| <b>AC</b>  | 468,173         | 42                 | <0.001   | 389.870          | 7                | <0.001   | 872.834    |
| <b>PC</b>  | 402,076         | 40                 | <0.001   | 323.773          | 5                | <0.001   | 810.737    |
| <b>Ad</b>  | 584,955         | 55                 | <0.001   | 506.653          | 20               | <0.001   | 963.616    |
| <b>Pd</b>  | 416,256         | 53                 | <0.001   | 337.953          | 18               | <0.001   | 798.917    |
| <b>Cd</b>  | 763,195         | 47                 | <0.001   | 684.892          | 12               | <0.001   | 1157.856   |
| <b>A</b>   | 585,225         | 56                 | <0.001   | 506.922          | 21               | <0.001   | 961.886    |
| <b>P</b>   | 496,451         | 54                 | <0.001   | 418.149          | 19               | <0.001   | 877.112    |
| <b>C</b>   | 823,981         | 48                 | <0.001   | 745.679          | 13               | <0.001   | 1216.642   |
| <b>t</b>   | 869,301         | 60                 | <0.001   | 790.999          | 25               | <0.001   | 1237.963   |
| <b>tA</b>  | 869,303         | 61                 | <0.001   | 791.000          | 26               | <0.001   | 1235.964   |
| <b>tP</b>  | 941,085         | 61                 | <0.001   | 862.783          | 26               | <0.001   | 1307.746   |
| <b>tC</b>  | 929,189         | 61                 | <0.001   | 850.887          | 26               | <0.001   | 1295.851   |
| <b>1</b>   | 944,405         | 62                 | <0.001   | 866.102          | 27               | <0.001   | 1309.066   |

A: age; AC: age-cohort; Ad: age-drift; AIC: Akaike Information Criterion; AP: Age-period; APC: age-period-cohort; C: cohort; Cd: cohort-drift; d: drift (linear trend); df: degrees of freedom; LR: likelihood ratio; P: period; PC: period-cohort: trend; Pd: period-drift; N/A: not applicable; t: trend; tA: linear trend in ages; tC: linear trend in cohorts; tP: linear trend in periods; 1: time-saturated model

<sup>a</sup>Table shows the fitting of APC model and all sub-models, and the results of the comparison between them using the Akaike Information Criterion (AIC). The most preferred model is that with the smallest AIC. Each row represents a model.

**Table S4.** Modeling of the effect of age, gender, year period and month on the incidence rate ratio of Attention deficit hyperactivity disorder (ADHD) (Poisson regression)<sup>a</sup>

| Predictors     | Incidence Rate Ratios | CI          | p      |
|----------------|-----------------------|-------------|--------|
| age_ [06]      | 2.26                  | 2.03 – 2.53 | <0.001 |
| age_ [07]      | 2.73                  | 2.45 – 3.04 | <0.001 |
| age_ [08]      | 2.57                  | 2.31 – 2.87 | <0.001 |
| age_ [09]      | 2.19                  | 1.96 – 2.45 | <0.001 |
| age_ [10]      | 1.77                  | 1.57 – 1.99 | <0.001 |
| age_ [11]      | 1.44                  | 1.27 – 1.63 | <0.001 |
| age_ [12]      | 1.55                  | 1.37 – 1.76 | <0.001 |
| age_ [13]      | 1.56                  | 1.38 – 1.77 | <0.001 |
| age_ [14]      | 1.44                  | 1.27 – 1.64 | <0.001 |
| age_ [15]      | 0.97                  | 0.84 – 1.13 | 0.727  |
| age_ [16]      | 0.71                  | 0.60 – 0.84 | <0.001 |
| age_ [17]      | 0.53                  | 0.43 – 0.65 | <0.001 |
| age_ [18]      | 0.29                  | 0.22 – 0.38 | <0.001 |
| gender_ [male] | 2.55                  | 2.43 – 2.68 | <0.001 |
| year_ [2004]   | 1.82                  | 1.45 – 2.30 | <0.001 |
| year_ [2005]   | 2.73                  | 2.22 – 3.40 | <0.001 |
| year_ [2006]   | 2.19                  | 1.77 – 2.73 | <0.001 |
| year_ [2007]   | 2.57                  | 2.09 – 3.19 | <0.001 |
| year_ [2008]   | 2.94                  | 2.40 – 3.64 | <0.001 |
| year_ [2009]   | 2.93                  | 2.39 – 3.62 | <0.001 |
| year_ [2010]   | 3.03                  | 2.48 – 3.75 | <0.001 |
| year_ [2011]   | 3.09                  | 2.53 – 3.82 | <0.001 |

|                           |       |             |                  |
|---------------------------|-------|-------------|------------------|
| year_ [2012]              | 3.60  | 2.96 – 4.44 | <b>&lt;0.001</b> |
| year_ [2013]              | 3.99  | 3.28 – 4.91 | <b>&lt;0.001</b> |
| year_ [2014]              | 3.39  | 2.78 – 4.18 | <b>&lt;0.001</b> |
| year_ [2015]              | 3.16  | 2.58 – 3.89 | <b>&lt;0.001</b> |
| year_ [2016]              | 2.88  | 2.36 – 3.56 | <b>&lt;0.001</b> |
| year_ [2017]              | 2.61  | 2.12 – 3.23 | <b>&lt;0.001</b> |
| year_ [2018]              | 2.71  | 2.20 – 3.36 | <b>&lt;0.001</b> |
| year_ [2019]              | 2.43  | 1.92 – 3.09 | <b>&lt;0.001</b> |
| month_ [02]               | 1.32  | 1.20 – 1.45 | <b>&lt;0.001</b> |
| month_ [03]               | 1.30  | 1.18 – 1.43 | <b>&lt;0.001</b> |
| month_ [04]               | 1.11  | 1.00 – 1.23 | <b>0.040</b>     |
| month_ [05]               | 1.17  | 1.06 – 1.29 | <b>0.002</b>     |
| month_ [06]               | 1.02  | 0.92 – 1.14 | 0.641            |
| month_ [07]               | 0.48  | 0.42 – 0.55 | <b>&lt;0.001</b> |
| month_ [08]               | 0.57  | 0.51 – 0.65 | <b>&lt;0.001</b> |
| month_ [09]               | 0.70  | 0.62 – 0.79 | <b>&lt;0.001</b> |
| month_ [10]               | 0.92  | 0.83 – 1.02 | 0.130            |
| month_ [11]               | 1.18  | 1.07 – 1.31 | <b>0.001</b>     |
| month_ [12]               | 1.05  | 0.94 – 1.16 | 0.385            |
| Observations              | 5064  |             |                  |
| R <sup>2</sup> Nagelkerke | 0.653 |             |                  |

<sup>a</sup>Reference categories: year 2003, month 01 (January), age 5. Estimates >1 represent higher incidences.

CI: confidence interval

**Table S5.** Prevalence of Attention deficit hyperactivity disorder (ADHD) diagnosis according to calendar year, patients' age at the time of ADHD diagnosis and gender

| Calendar year | Age at the time of ADHD diagnosis (years) | Prevalence (per 100 persons) |       |         | p-Value |
|---------------|-------------------------------------------|------------------------------|-------|---------|---------|
|               |                                           | Overall                      | Males | Females |         |
| 2007          | 5                                         | 0.15                         | 0.15  | 0.16    | 1       |
|               | 7                                         | 2.06                         | 3.18  | 0.91    | <0.01   |
|               | 9                                         | 3.06                         | 4.17  | 1.86    | <0.01   |
|               | 11                                        | 3.54                         | 5.53  | 1.51    | <0.01   |
|               | 13                                        | 3.23                         | 4.93  | 1.41    | <0.01   |
|               | 15                                        | 2.83                         | 4.53  | 0.95    | <0.01   |
|               | 17                                        | --                           | --    | --      | --      |
|               | 19                                        | --                           | --    | --      | --      |
| 2011          | 5                                         | 0.25                         | 0.38  | 0.12    | 0.05    |
|               | 7                                         | 2.00                         | 2.93  | 0.99    | <0.01   |
|               | 9                                         | 4.88                         | 6.75  | 2.96    | <0.01   |
|               | 11                                        | 5.98                         | 8.19  | 3.74    | <0.01   |
|               | 13                                        | 5.66                         | 7.87  | 3.28    | <0.01   |
|               | 15                                        | 5.68                         | 8.83  | 2.47    | <0.01   |
|               | 17                                        | 4.77                         | 7.27  | 2.11    | <0.01   |
|               | 19                                        | 3.14                         | 4.96  | 1.13    | <0.01   |
| 2015          | 5                                         | 0.15                         | 0.24  | 0.06    | 0.11    |
|               | 7                                         | 1.88                         | 2.85  | 0.82    | <0.01   |
|               | 9                                         | 4.23                         | 5.44  | 2.99    | <0.01   |
|               | 11                                        | 6.16                         | 8.64  | 3.47    | <0.01   |
|               | 13                                        | 7.31                         | 10.28 | 4.24    | <0.01   |
|               | 15                                        | 8.19                         | 11.46 | 4.87    | <0.01   |
|               | 17                                        | 7.57                         | 10.66 | 4.26    | <0.01   |
|               | 19                                        | 6.48                         | 9.71  | 3.19    | <0.01   |
| 2019          | 5                                         | --                           | --    | --      | --      |
|               | 7                                         | --                           | --    | --      | --      |
|               | 9                                         | 2.94                         | 4.34  | 1.45    | <0.01   |
|               | 11                                        | 4.31                         | 6.20  | 2.24    | <0.01   |
|               | 13                                        | 5.63                         | 7.34  | 3.91    | <0.01   |
|               | 15                                        | 7.44                         | 10.31 | 4.30    | <0.01   |
|               | 17                                        | 8.52                         | 12.01 | 4.90    | <0.01   |
|               | 19                                        | 8.74                         | 12.05 | 5.37    | <0.01   |

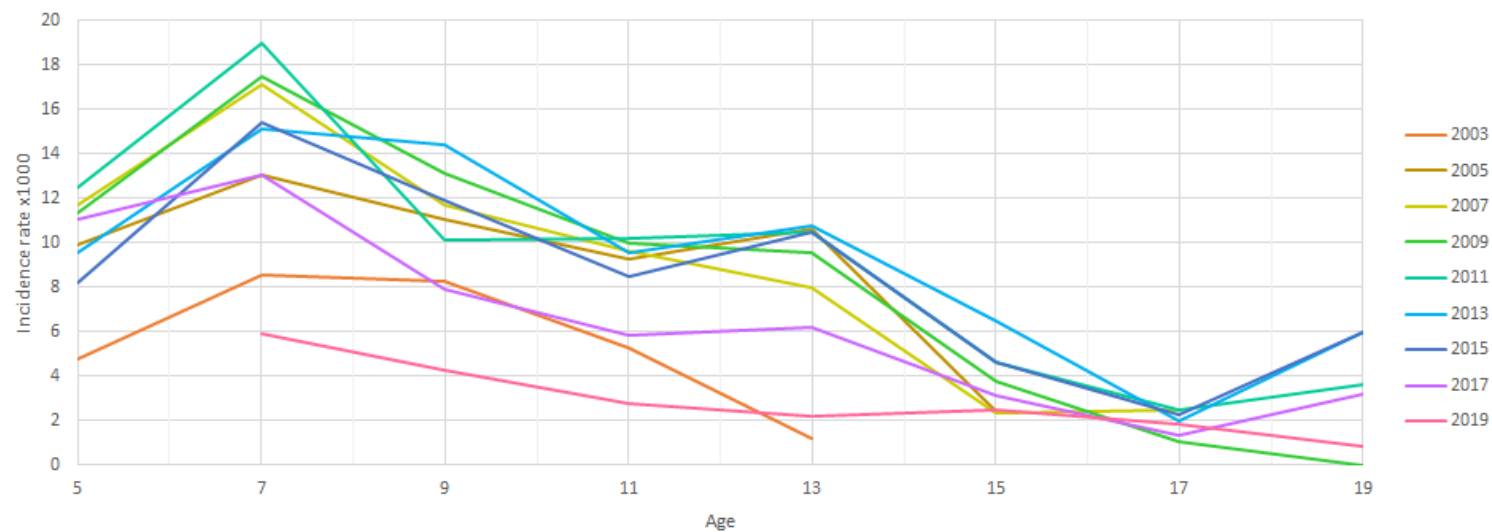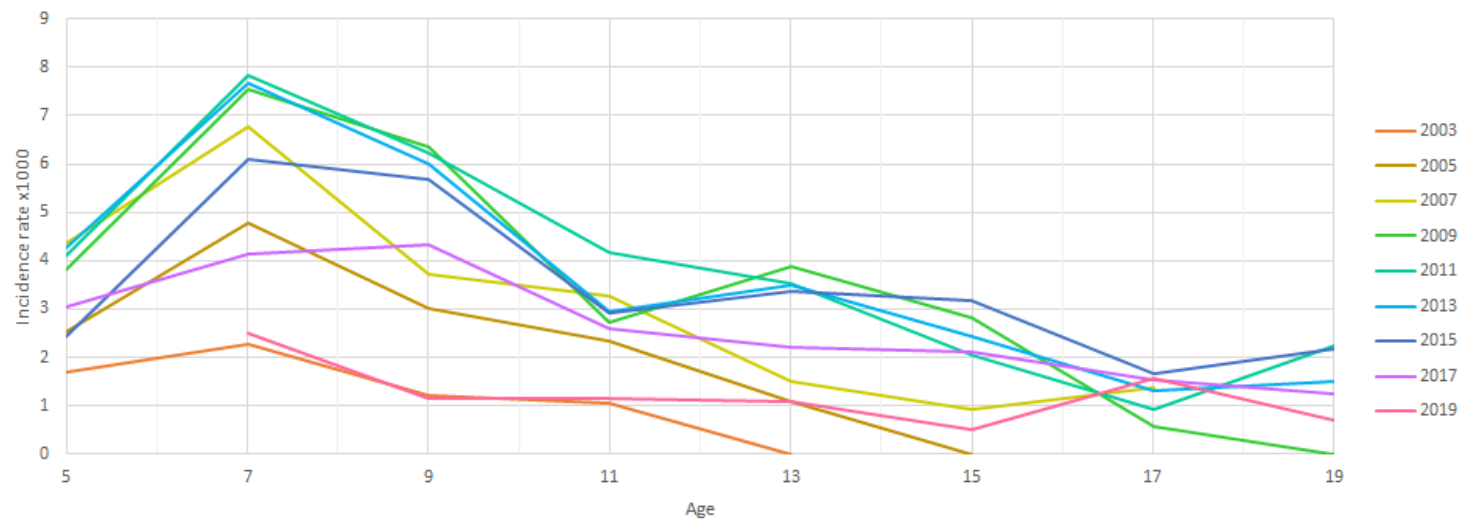

**Figure S1.** Incidence of Attention deficit hyperactivity disorder (ADHD) diagnosis according to age at the time of ADHD diagnosis and calendar year. Top: MALES. Bottom: FEMALES

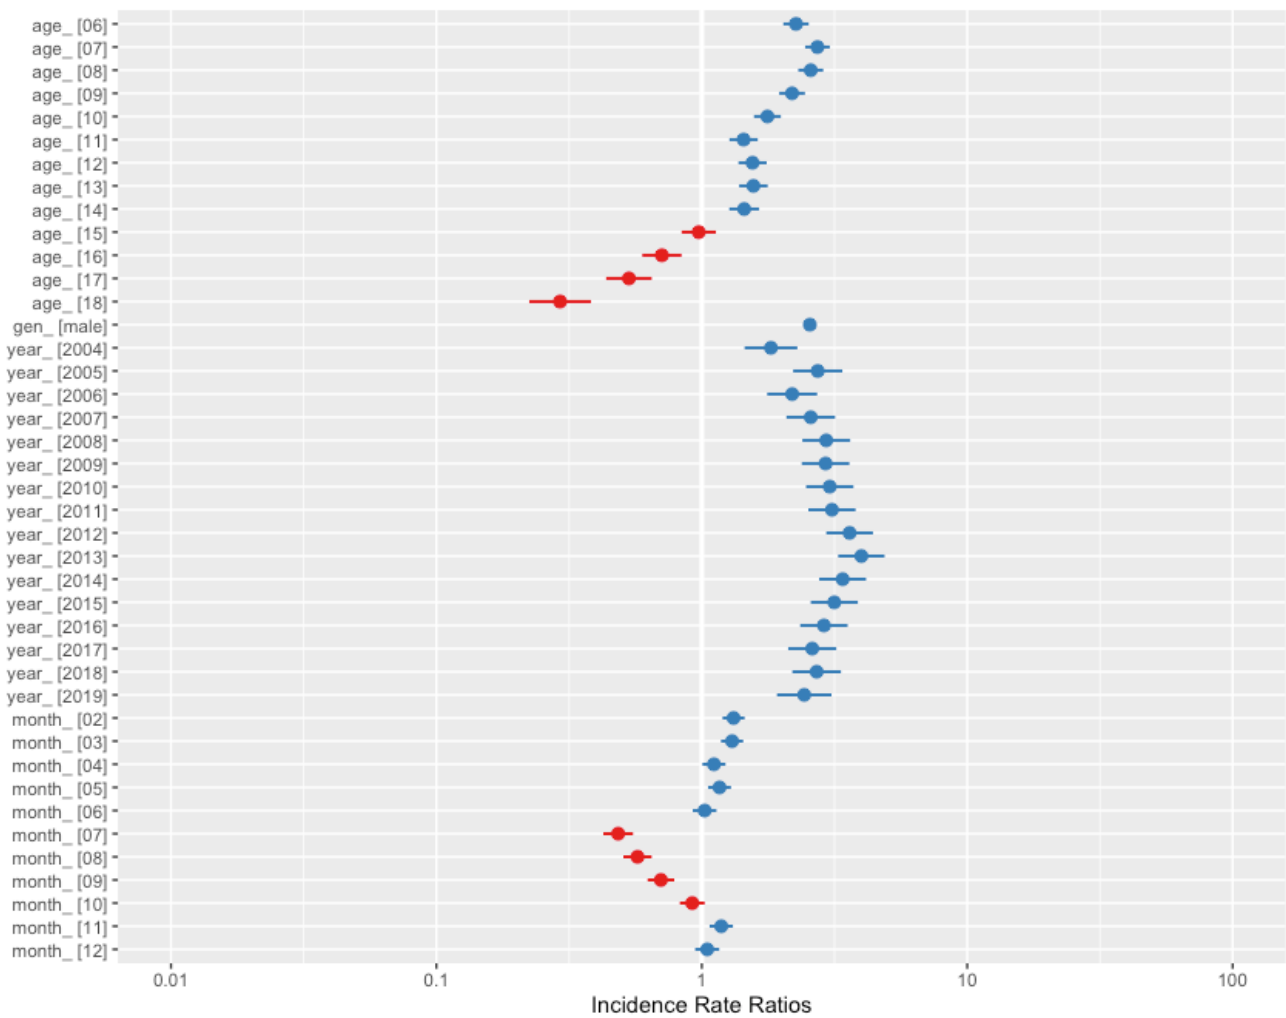

**Figure S2.** Modeling of the effect of age, gender, year period and month on the incidence rate ratio of Attention deficit hyperactivity disorder (ADHD) (Poisson regression). Reference categories: year 2003, month 01 (January), age 5. Estimates >1 represent higher incidences.



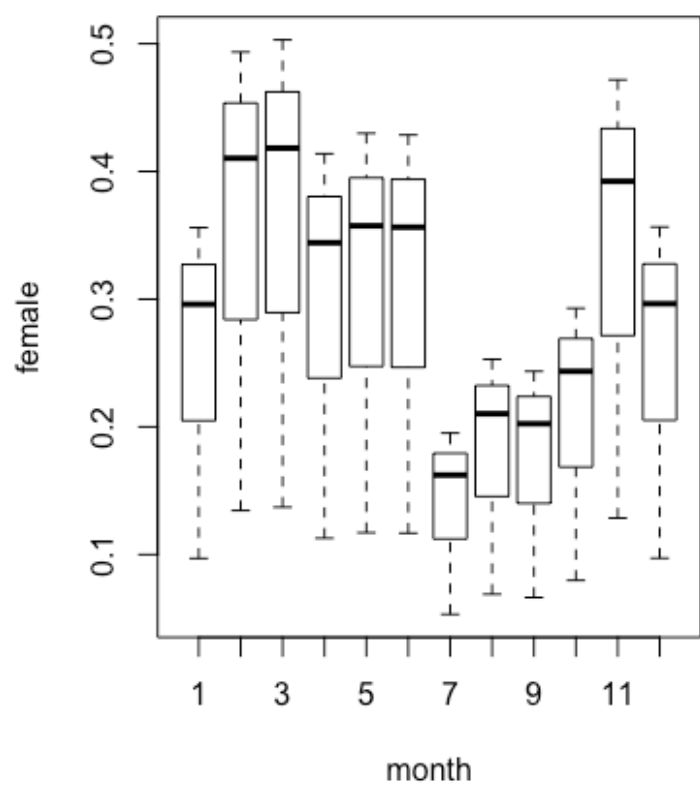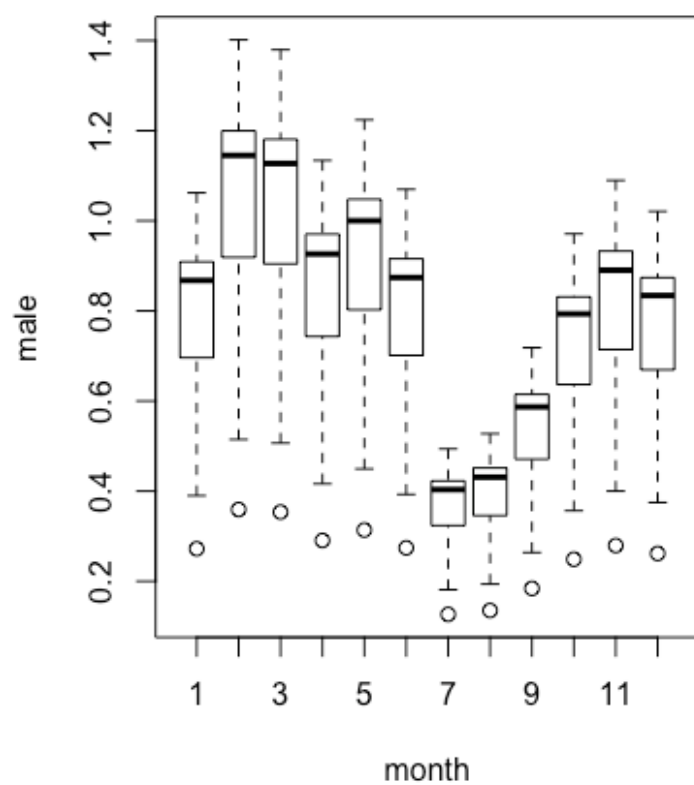

**Figure S3.** Seasonality of Attention deficit hyperactivity disorder (ADHD) incidence. Left: **FEMALES**. Right: **MALES**

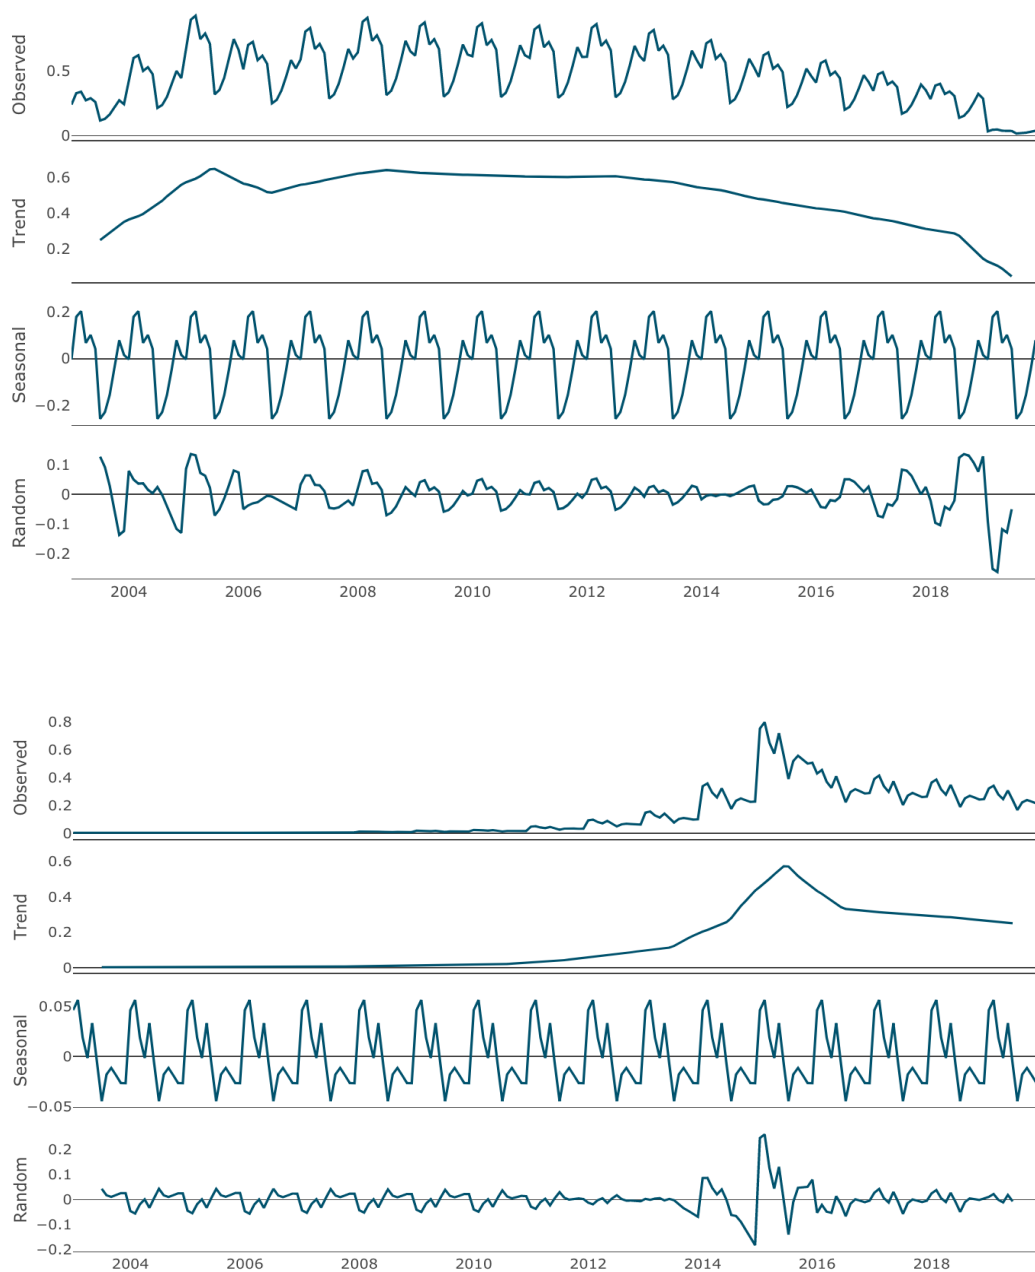

**Figure S4.** Decomposition of monthly time series of the standardized Attention deficit hyperactivity disorder (ADHD) incidence rate by calendar year (both males and females) (2019 data up to 20 November). Top: ADHD diagnoses from **PRIMARY CARE**. Bottom: ADHD diagnoses from **SPECIALIZED CARE**

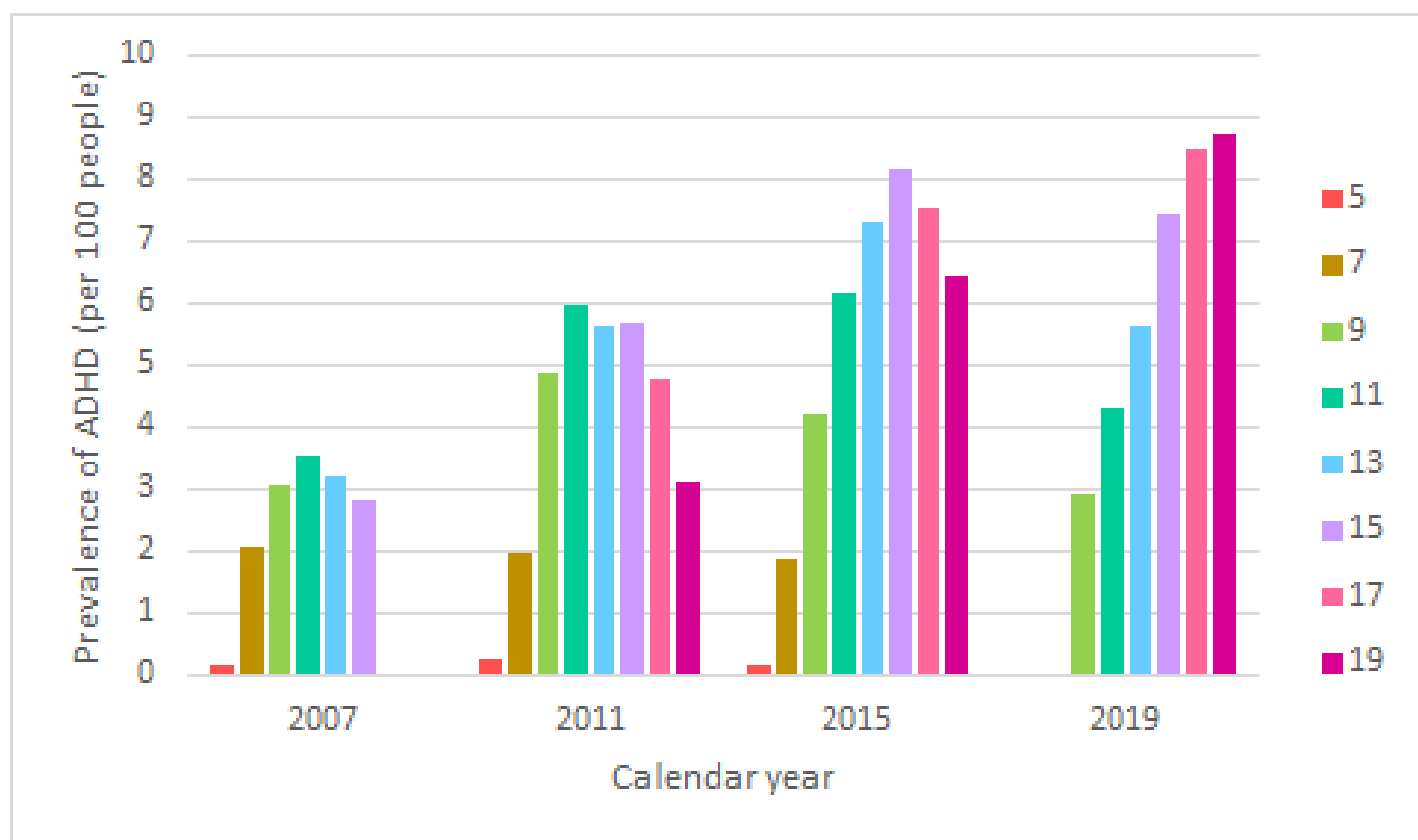

**Figure S5.** Prevalence of Attention deficit hyperactivity disorder (ADHD) diagnoses according to calendar year and patients' age at the time of ADHD diagnosis (both males and females)
